# Supplementary material
Source: publisher site journal article supplement (https://www.dovepress.com/article/207857)
Supplement: Supplementary file 1 [file get_supplementary_file.php]

**Table S1.** Distribution of *E. coli* according to colonization sites in 62 pregnant women

|                     | Vagina | Rectum  | Vagina and/or Rectum |
|---------------------|--------|---------|----------------------|
| EAEC                | ...    | 1 (2)   | 1 (2)                |
| EIEC                | ...    | 3 (5)   | 3 (5)                |
| ETEC                | 1 (6)  | 3 (5)   | 2 (3)                |
| ExPEC               | 8 (44) | 19 (34) | 23 (32)              |
| EAEC & ExPEC        | ...    | 1 (2)   | 1 (2)                |
| EHEC & ETEC         | ...    | 2 (4)   | 1 (2)                |
| EHEC & ExPEC        | ...    | 1 (2)   | 1 (2)                |
| EIEC & ExPEC        | 1 (6)  | 3 (5)   | 3 (5)                |
| ETEC & ExPEC        | 5 (28) | 6 (11)  | 8 (13)               |
| EHEC & EIEC & ETEC  | ...    | 1 (2)   | 1 (2)                |
| EHEC & EIEC & ExPEC | 1 (6)  | ...     | 1 (2)                |
| EHEC & ETEC & ExPEC | ...    | ...     | 1 (2)                |
| EIEC & ETEC & ExPEC | ...    | 1 (2)   | 3 (5)                |
| Commensal strain    | 2 (11) | 14 (25) | 13 (21)              |
| Total ( <i>n</i> )  | 18     | 56      | 62                   |

All data are presented as *n* (%). *E. coli*, *Escherichia coli*; EAEC, enteroaggregative *E. coli*; EIEC, enteroinvasive *E. coli*; EHEC, enterohemorrhagic *E. coli*; ETEC, enterotoxigenic *E. coli*; ExPEC, extraintestinal pathogenic *E. coli*; ..., no data.

**Table S2. Sampling time points with positive results for *E. coli* colonization in each pathotype among 49 pregnant women**

| Time point         | ExPEC <sup>a</sup> | ETEC <sup>b</sup> | EIEC   | EHEC   | EAEC   |
|--------------------|--------------------|-------------------|--------|--------|--------|
| First trimester    | 3 (7)              | 0 (0)             | 0 (0)  | 0 (0)  | 1 (50) |
| Second trimester   | 11 (27)            | 7 (41)            | 5 (50) | 3 (60) | 0 (0)  |
| Third trimester    | 31 (76)            | 11 (65)           | 5 (50) | 2 (40) | 1 (50) |
| Total ( <i>n</i> ) | 41                 | 17                | 10     | 5      | 2      |

All data are presented as *n* (%). *E. coli*, *Escherichia coli*; EAEC, enteroaggregative *E. coli*; EIEC, enteroinvasive *E. coli*; EHEC, enterohemorrhagic *E. coli*; ETEC, enterotoxigenic *E. coli*; ExPEC, extraintestinal pathogenic *E. coli*;

<sup>a</sup> One case of ExPEC carrier was identified using samples collected during the first and second trimesters.

Three cases of ExPEC carriers were identified using samples collected during the second and third trimesters.

<sup>b</sup> One case of ETEC carrier was identified using samples collected during the second and third trimesters.

<sup>c</sup> First trimester: up to 13 + 6 weeks; second trimester: 14 + 0 to 27 + 6 weeks; third trimester: 28 + 0 weeks to delivery.
